# Supplementary material
Source: MDPI journal article supplement (https://www.mdpi.com/2073-4352/11/11/1420)
Supplement: s1 [file s1]

## Supporting Information

Pressure tuned structural, electronic and elastic properties of  $\text{U}_3\text{Si}_2\text{C}_2$ : a first principles study

Table S1 The lattice parameters of the optimized cells. The positions of atoms along c axis (0, 0, z) are listed.

| Pressure (GPa) | a=b (Å) | c(Å)   | z(U1) (Å) | z(U2) (Å) | z(Si) (Å) | z(C) (Å) |
|----------------|---------|--------|-----------|-----------|-----------|----------|
| 0              | 3.651   | 18.052 | 0         | 3.249     | 7.465     | 5.543    |
| 4              | 3.615   | 17.749 | 0         | 3.174     | 7.367     | 5.457    |
| 8              | 3.588   | 17.553 | 0         | 3.123     | 7.296     | 5.382    |
| 9.8            | 3.574   | 17.440 | 0         | 3.097     | 7.259     | 5.349    |
| 10             | 3.574   | 18.026 | 0         | 3.246     | 7.422     | 5.526    |
| 12             | 3.562   | 17.920 | 0         | 3.220     | 7.386     | 5.493    |
| 16             | 3.540   | 17.709 | 0         | 3.169     | 7.313     | 5.427    |
| 20             | 3.520   | 17.526 | 0         | 3.125     | 7.249     | 5.369    |
| 24             | 3.501   | 17.363 | 0         | 3.085     | 7.192     | 5.317    |

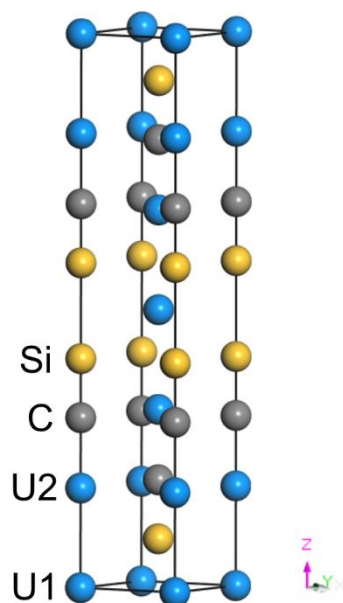

Figure S1 The crystal structure of  $\text{U}_3\text{Si}_2\text{C}_2$  (blue: uranium; grey: carbon; yellow: silicon). The atoms listed in Table S1 have been marked.

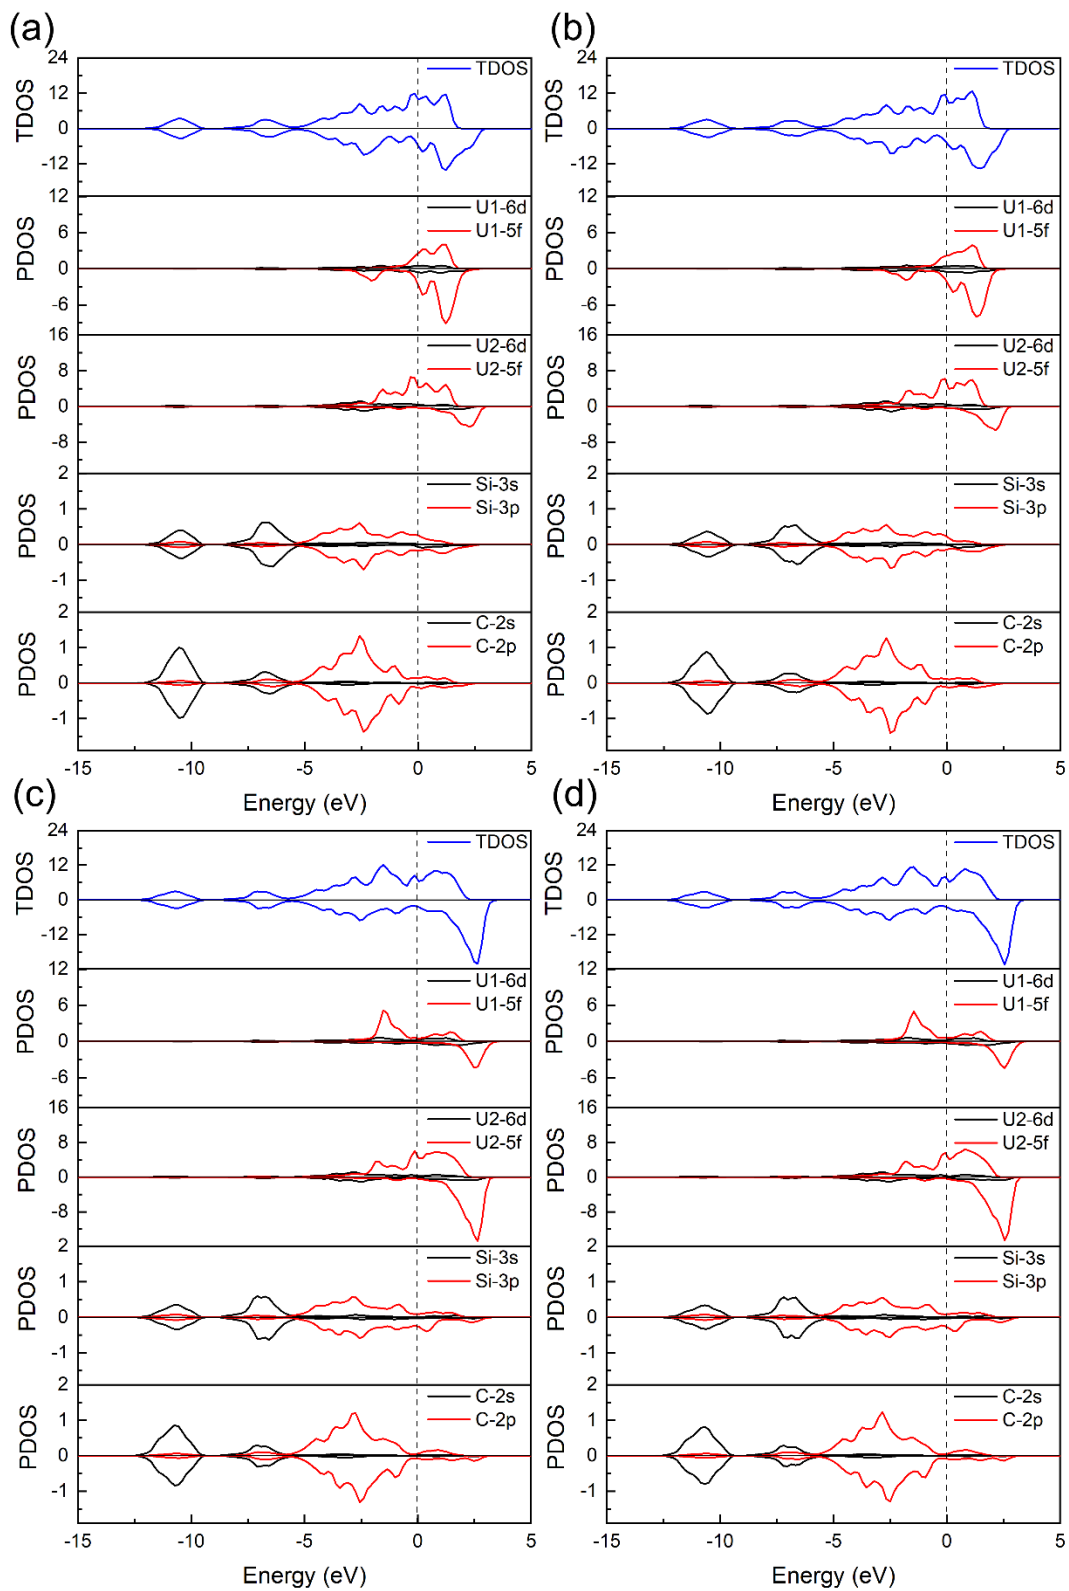

Figure S2 The total density of state (TDOS) and partial density of state (PDOS) of  $\text{U}_3\text{Si}_2\text{C}_2$  under different pressures: (a) 0 GPa; (b) 8 GPa; (c) 12 GPa and (d) 16 GPa. The dash line represents Fermi energy.
